# Supplementary material
Source: PubMed Central journal article supplement (PMC2836806)
Supplement: NIHMS102809-supplement-Figure_1_Permission.pdf [file NIHMS102809-supplement-Figure_1_Permission.pdf]

**THE AMERICAN ASSOCIATION FOR THE ADVANCEMENT OF SCIENCE LICENSE  
TERMS AND CONDITIONS**

Jan 07, 2009

---

---

This is a License Agreement between Jaimie M Van Norman ("You") and The American Association for the Advancement of Science ("The American Association for the Advancement of Science"). The license consists of your order details, the terms and conditions provided by The American Association for the Advancement of Science, and the payment terms and conditions.

|                                          |                                                                                                                                        |
|------------------------------------------|----------------------------------------------------------------------------------------------------------------------------------------|
| License Number                           | 2103860139590                                                                                                                          |
| License date                             | Jan 07, 2009                                                                                                                           |
| Licensed content publisher               | The American Association for the Advancement of Science                                                                                |
| Licensed content publication             | Science                                                                                                                                |
| Licensed content title                   | A High-Resolution Root Spatiotemporal Map Reveals Dominant Expression Patterns                                                         |
| Licensed content author                  | Siobhan M. Brady, David A. Orlando, Ji-Young Lee, Jean Y. Wang, Jeremy Koch, Jose R. Dinneny, Daniel Mace, Uwe Ohler, Philip N. Benfey |
| Licensed content date                    | Nov 2, 2007                                                                                                                            |
| Type of Use                              | Journal                                                                                                                                |
| Requestor type                           | Original Author                                                                                                                        |
| Format                                   | Print and Electronic                                                                                                                   |
| Portion                                  | Figure                                                                                                                                 |
| Will you be translating?                 | No                                                                                                                                     |
| Order reference number                   | jv33                                                                                                                                   |
| Title of new article                     | Arabidopsis as a Model Organism in Systems Biology                                                                                     |
| Publication the new article is in        | Wiley Interdisciplinary Reviews: Systems Biology and Medicine                                                                          |
| Publisher of new article                 | Wiley                                                                                                                                  |
| Author of new article                    | Jaimie M. Van Norman and Philip N. Benfey                                                                                              |
| Expected publication date of new article | Apr 2009                                                                                                                               |
| Estimated size of new article (pages)    | 10                                                                                                                                     |
| Total                                    | 0.00 USD                                                                                                                               |

[Terms and Conditions](#)

American Association for the Advancement of Science TERMS AND CONDITIONS

Regarding your request, we are pleased to grant you non-exclusive, non-transferable permission, to republish the AAAS material identified above in your work identified above, subject to the terms and conditions herein. We must be contacted for permission for any uses other than those specifically identified in your request above.

The following credit line must be printed along with the AAAS material: "From [Full Reference Citation]. Reprinted with permission from AAAS."

All required credit lines and notices must be visible any time a user access any part of the AAAS material and must appear on any printed copies and authorized user might make.

This permission does not apply to figures / photos / artwork or any other content or materials included in your work that are credited to non-AAAS sources. If the requested material is sourced to or references non-AAAS sources, you must obtain authorization from that source as well before using that material. You agree to hold harmless and indemnify AAAS against any claims arising from your use of any content in your work that is credited to non-AAAS sources.

If the AAAS material covered by this permission was published in Science during the years 1974 - 1994, you must also obtain permission from the author, who may grant or withhold permission, and who may or may not charge a fee if permission is granted. See original article for author's address. This condition does not apply to news articles.

The AAAS material may not be modified or altered except that figures and tables may be modified with permission from the author. Author permission for any such changes must be secured prior to your use.

Whenever possible, we ask that electronic uses of the AAAS material permitted herein include a hyperlink to the original work on AAAS's website (hyperlink may be embedded in the reference citation).

AAAS material reproduced in your work identified herein must not account for more than 30% of the total contents of that work.

AAAS must publish the full paper prior to use of any text.

AAAS material must not be used in a derogatory manner and must not imply any endorsement by the American Association for the Advancement of Science.

This permission is not valid for the use of the AAAS and/or Science logos.

AAAS makes no representations or warranties as to the accuracy of any information contained in the AAAS material covered by this permission, including any warranties of merchantability or fitness for a particular purpose.

If permission fees for this use are waived, please note that AAAS reserves the right to charge for reproduction of this material in the future.

Permission is not valid unless payment is received within sixty (60) days of the issuance of

this permission. If payment is not received within this time period then all rights granted herein shall be revoked and this permission will be considered null and void.

In the event of breach of any of the terms and conditions herein or any of CCC's Billing and Payment terms and conditions, all rights granted herein shall be revoked and this permission will be considered null and void.

AAAS reserves the right to terminate this permission and all rights granted herein at its discretion, for any purpose, at any time. In the event that AAAS elects to terminate this permission, you will have no further right to publish, publicly perform, publicly display, distribute or otherwise use any matter in which the AAAS content had been included, and all fees paid hereunder shall be fully refunded to you. Notification of termination will be sent to the contact information as supplied by you during the request process and termination shall be immediate upon sending the notice. Neither AAAS nor CCC shall be liable for any costs, expenses, or damages you may incur as a result of the termination of this permission, beyond the refund noted above.

This Permission may not be amended except by written document signed by both parties.

The terms above are applicable to all permissions granted for the use of AAAS material. Below you will find additional conditions that apply to your particular type of use.

#### **FOR A THESIS OR DISSERTATION**

Permission covers figure/table and text excerpt use in print and electronic versions of a dissertation or thesis.

A full text article may be used in print versions only of a dissertation or thesis.

Permission covers the distribution of your dissertation or thesis on demand by ProQuest / UMI, provided the AAAS material covered by this permission remains in situ.

#### **FOR JOURNALS:**

Permission covers both print and electronic versions of your journal article, however the AAAS material may not be used in any manner other than within the context of your article.

#### **FOR BOOKS/TEXTBOOKS:**

Permission covers print and electronic versions, provided any such electronic version is equivalent to or substitutes for the print version and where the AAAS material reproduced as permitted herein remains in situ and is not exploited separately (for example, if permission covers the use of a full text article, the article may not be offered for access or for purchase as a stand-alone unit), except in the case of permitted textbook companions as noted below.

You must include the following notice in any electronic versions, either adjacent to the reprinted AAAS material or in the terms and conditions for use of your electronic products: "Readers may view, browse, and/or download material for temporary copying purposes only, provided these uses are for noncommercial personal purposes. Except as provided by law, this material may not be further reproduced, distributed, transmitted, modified, adapted, performed, displayed, published, or sold in whole or in part, without prior written permission from the publisher."

If your book is an academic textbook, permission covers the following companions to your textbook, provided such companions are distributed only in conjunction with your textbook at no additional cost to the user:

- Password-protected website
- Instructor's image CD/DVD and/or PowerPoint resource
- Student CD/DVD All companions must contain instructions to users that the AAAS material may be used for non-commercial, classroom purposes only. Any other uses require the prior written permission from AAAS.

Rights also extend to copies/files of your Work (as described above) that you are required to provide for use by the visually and/or print disabled in compliance with state and federal laws.

This permission only covers a single edition of your work as identified in your request for the specific print run identified in your request. If this license is to reuse figures, then permission is granted for non-exclusive world rights in all languages.

**FOR NEWSLETTERS:**

Permission covers print and/or electronic versions, provided the AAAS material reproduced as permitted herein remains in situ and is not exploited separately (for example, if permission covers the use of a full text article, the article may not be offered for access or for purchase as a stand-alone unit)

**FOR ANNUAL REPORTS:** Permission covers print and electronic versions provided the AAAS material reproduced as permitted herein remains in situ and is not exploited separately (for example, if permission covers the use of a full text article, the article may not be offered for access or for purchase as a stand-alone unit)

**FOR PROMOTIONAL/MARKETING USES:** Permission covers the use of AAAS material in promotional or marketing pieces such as information packets, media kits, product slide kits, brochures, or flyers limited to a single print run. The AAAS Material may not be used in any manner which implies endorsement or promotion by the American Association for the Advancement of Science (AAAS) or Science of any product or service. AAAS does not permit the reproduction of its name, logo or text on promotional literature.

If permission to use a full text article is permitted, The Science article covered by this permission must not be altered in any way. No additional printing may be set onto an article copy other than the copyright credit line required above. Any alterations must be approved in advance and in writing by AAAS. This includes, but is not limited to, the placement of sponsorship identifiers, trademarks, logos, rubber stamping or self-adhesive stickers onto the article copies.

Additionally, article copies must be a freestanding part of any information package (i.e. media kit) into which they are inserted. They may not be physically attached to anything, such as an advertising insert, or have anything attached to them, such as a sample product. Article copies must be easily removable from any kits or informational packages in which they are used. The only exception is that article copies may be inserted into three-ring binders.

**FOR CORPORATE INTERNAL USE**

The AAAS material covered by this permission may not be altered in any way. No additional printing may be set onto an article copy other than the required credit line. Any alterations must be approved in advance and in writing by AAAS. This includes, but is not limited to the placement of sponsorship identifiers, trademarks, logos, rubber stamping or self-adhesive stickers onto article copies.

If you are making article copies, copies are restricted to the number indicated in your request and must be distributed only to internal employees for internal use.

If you are using AAAS Material in Presentation Slides, the required credit line must be visible on the slide where the AAAS material will be reprinted

If you are using AAAS Material on a CD, DVD, Flash Drive, or the World Wide Web, you must include the following notice in any electronic versions, either adjacent to the reprinted AAAS material or in the terms and conditions for use of your electronic products: "Readers may view, browse, and/or download material for temporary copying purposes only, provided these uses are for noncommercial personal purposes. Except as provided by law, this material may not be further reproduced, distributed, transmitted, modified, adapted, performed, displayed, published, or sold in whole or in part, without prior written permission from the publisher." Access to any such CD, DVD, Flash Drive or Web page must be restricted to your organization's employees only.

**FOR CME COURSE and SCIENTIFIC SOCIETY MEETINGS**

Permission is restricted to the particular Course, Seminar, Conference, or Meeting indicated in your request. Access to the reprinted AAAS material must be restricted to attendees of your event only (if you have been granted Web rights for use of a full text article, your website must be password protected, or access restricted so that only attendees can access the content on your site).

If you are using AAAS Material on a CD, DVD, Flash Drive, or the World Wide Web, you must include the following notice in any electronic versions, either adjacent to the reprinted AAAS material or in the terms and conditions for use of your electronic products: "Readers may view, browse, and/or download material for temporary copying purposes only, provided these uses are for noncommercial personal purposes. Except as provided by law, this material may not be further reproduced, distributed, transmitted, modified, adapted, performed, displayed, published, or sold in whole or in part, without prior written permission from the publisher."

**FOR POLICY REPORTS**

These rights are granted only to non-profit government agencies. Permission covers print and electronic versions of a report, provided the required credit line appears in both versions and provided the AAAS material reproduced as permitted herein remains in situ and is not exploited separately.

**FOR CLASSROOM PHOTOCOPIES**

Permission covers distribution in print copy format only.

Article copies must be freestanding. They may not be physically attached to anything or have anything attached to them.

### **FOR COURSEPACKS OR COURSE WEBSITES**

These rights cover use of the AAAS material in one class at one institution. Permission is valid only for a single semester after which the AAAS material must be removed from the Electronic Course website, unless new permission is obtained for an additional semester. If the material is to be distributed online, access must be restricted to students and instructors enrolled in that particular course by some means of password or access control.

### **FOR WEBSITES**

You must include the following notice in any electronic versions, either adjacent to the reprinted AAAS material or in the terms and conditions for use of your electronic products: "Readers may view, browse, and/or download material for temporary copying purposes only, provided these uses are for noncommercial personal purposes. Except as provided by law, this material may not be further reproduced, distributed, transmitted, modified, adapted, performed, displayed, published, or sold in whole or in part, without prior written permission from the publisher."

Permissions for the use of Full Text articles on third party websites are granted on a case by case basis and only in cases where access to the AAAS Material is restricted by some means of password or access control. Alternately, an E-Print may be purchased through our reprints department ([brocheleau@rockwaterinc.com](mailto:brocheleau@rockwaterinc.com))

### **FOR MOVIES / FILM / TELEVISION**

Permission is granted to use, record, film, photograph, and/or tape the AAAS material in connection with your program/film and in any medium your program/film may be shown or heard, including but not limited to broadcast and cable television, radio, print, world wide web, and videocassette.

The required credit line should run in the program/film's end credits.

### **FOR MUSEUM EXHIBITIONS**

Permission is granted to use the AAAS material as part of a single exhibition for the duration of that exhibit. Permission for use of the material in promotional materials for the exhibit must be cleared separately with AAAS (please contact us at [permissions@aaas.org](mailto:permissions@aaas.org)).

### **FOR TRANSLATIONS**

Translation rights apply only to the language identified in your request summary above.

The following disclaimer must appear with your translation, on the first page of the article, after the credit line: "This translation is not an official translation by AAAS staff, nor is it endorsed by AAAS as accurate. In crucial matters, please refer to the official English-language version originally published by AAAS."

**By using the AAAS Material identified in your request, you agree to abide by all the terms and conditions herein.**

Questions about these terms can be directed to the AAAS Permissions department. Email us at [permissions@aaas.org](mailto:permissions@aaas.org).

v1.1

---

---
